# Supplementary material for: Radiographic Imaging for the Diagnosis and Treatment of Patients with Skeletal Class III Malocclusion
Source: MDPI journal article supplement (doi:10.3390/diagnostics14050544), 2024-03-04
Supplement: s1 [file s1]

## Appendix

**Table S1.** Description of the critical landmark, plane and measurement on radiograms

| Measurements                    | Description                                                                                                       |
|---------------------------------|-------------------------------------------------------------------------------------------------------------------|
| A                               | The deepest point on the curvature of the maxillary alveolar process                                              |
| Anterior facial height (AFH)    | The vertical distance between N and Me                                                                            |
| Anterior nasal spine (ANS)      | The extreme anterior point on the maxilla                                                                         |
| Articulare (Ar)                 | The point of intersection of the dorsal contour of the condylar head and the contour of the external cranial base |
| ArH                             | The distance between Ar and SH plane                                                                              |
| B                               | The deepest point on the curvature of the mandibular alveolar process                                             |
| Basion (Ba)                     | The most inferior posterior point on the sagittal plane on the anterior border of the foramen magnum              |
| Condylar axis (CondAx)          | An axis passing through C and Co                                                                                  |
| Condylar center (C)             | The center of the condyle                                                                                         |
| Condylion (Co)                  | The most posterior and superior point of the mandibular condyle                                                   |
| Condylion intersection (Coi)    | The intersection of Co perpendicular line tangent to posterior border of the ramus                                |
| Facial plane (FP)               | A plane passing through N and Pog                                                                                 |
| Frankfurt-Horizontal (FH) plane | A plane passing through Po and Or                                                                                 |
| Great divide (GD) line          | A vertical line passing through S, perpendicular to SH plane                                                      |
| Gnathion (Gn)                   | The most downward and forward point on the mandibular symphysis                                                   |
| Gonion (Go)                     | The midpoint of the mandibular angle between the mandibular ramus and corpus                                      |
| Gonion Intersection (Goi)       | The point of intersection between the mandibular and ramus planes                                                 |
| GZN angle                       | The angle formed by the SN plane and mandibular ramus plane                                                       |
| Infradentale (Id)               | The point of the alveolar contact with the lower central incisor                                                  |
| Lower facial height (LFH)       | The distance between ANS and Me                                                                                   |
| Lower incisor apex (L1A)        | The root apex of the most anterior mandibular central incisor                                                     |
| Lower incisor (L1)              | The tip of the crown of the most anterior mandibular central incisor                                              |
| L1H                             | The distance between L1 and SH plane                                                                              |
| Lower lip (LL)                  | Vermillion border of the lower lip                                                                                |
| Menton (Me)                     | The extreme inferior point of the mandibular symphysis                                                            |
| Mandibular plane (MP)           | A plane passing through Gn and Me                                                                                 |

|                               |                                                                                                                                           |
|-------------------------------|-------------------------------------------------------------------------------------------------------------------------------------------|
| Mandibular ramus (Rm) plane   | The line tangential to the posterior border of the mandibular ramus                                                                       |
| Nasion (N)                    | The extreme anterior point on the fronto-nasal suture                                                                                     |
| N perp                        | Perpendicular to FH plane and passing through N                                                                                           |
| Soft tissue nasion (N')       | Most posterior point on the soft tissue contour on the area of the frontonasal suture                                                     |
| N' perp                       | Perpendicular to FH plane and passing through N'                                                                                          |
| Occlusal plane (OP)           | An imaginary plane that extends from the incisal edges of the front teeth and passes through the tips of the cusps of the posterior teeth |
| Orbitale (Or)                 | The deepest point on the infraorbital margin                                                                                              |
| Palatal plane (PP)            | A plane passing through PNS and ANS                                                                                                       |
| PH                            | The distance between PNS and SH                                                                                                           |
| Posterior nasal spine (PNS)   | Posterior nasal spine: the extreme posterior point on the maxilla                                                                         |
| Porion (Po)                   | The upper midpoint point on the external auditory meatus                                                                                  |
| Pogonion (Pog)                | The extreme anterior point of the mandibular symphysis                                                                                    |
| Pogonion intersection (Pogi)  | The intersection of Pog perpendicular line tangent to inferior border of the mandible                                                     |
| Pterygoid point (Pt)          | The extreme superior point of the pterygopalatine fossa                                                                                   |
| Sella (S)                     | The midpoint of sella turcica                                                                                                             |
| Soft tissue pogpnion (Pog')   | Most anterior point on the soft tissue contour on the mentum                                                                              |
| Stable basicranial line (SBL) | A plane passing through point T and tangent to the cribriform plate of the ethmoid bone                                                   |
| Sella horizontal (SH) plane   | A horizontal line through S 7 degrees below SN plane                                                                                      |
| SN plane                      | A plane passing through S and N                                                                                                           |
| T                             | Uppermost point at the junction of the frontal wall of pituitary fossa and tuberculum sellae                                              |
| Upper incisor (U1)            | The tip of the crown of the most anterior maxillary central incisor                                                                       |
| Upper incisor apex (U1A)      | The root apex of the most anterior maxillary central incisor                                                                              |
| Upper lip (UL)                | Vermillion border of the upper lip                                                                                                        |

---
